# Supplementary material for: Nitrate deposition and preservation in the snowpack along a traverse from coast to the ice sheet summit (Dome A) in East Antarctica
Source: Copernicus journal article supplement (doi:10.5194/tc-12-1177-2018), 2018-04-05
Supplement: Supplementary file 1 [file tc-12-1177-2018-supplement.pdf]

Supplement of The Cryosphere, 12, 1177–1194, 2018  
<https://doi.org/10.5194/tc-12-1177-2018-supplement>  
© Author(s) 2018. This work is distributed under  
the Creative Commons Attribution 4.0 License.

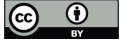

*Supplement of*

## **Nitrate deposition and preservation in the snowpack along a traverse from coast to the ice sheet summit (Dome A) in East Antarctica**

**Guitao Shi et al.**

*Correspondence to:* Guitao Shi (gt\_shi@163.com) and Meredith G. Hastings (meredith\_hastings@brown.edu)

The copyright of individual parts of the supplement might differ from the CC BY 4.0 License.

5 Table S1 Atmospheric concentrations of  $\text{NO}_3^-$  and  $\text{SO}_4^{2-}$  on the traverse from coastal Zhongshan Station  
 6 to Dome A in East Antarctica.

| Sample ID | Sampling date          | Sampling location         |                          | Atmospheric $\text{NO}_3^-$<br>/ng m <sup>-3</sup> | Atmospheric $\text{SO}_4^{2-}$<br>/ng m <sup>-3</sup> |
|-----------|------------------------|---------------------------|--------------------------|----------------------------------------------------|-------------------------------------------------------|
|           |                        | Longitude/ <sup>o</sup> E | Latitude/ <sup>o</sup> S |                                                    |                                                       |
| AN01      | 15-16, Dec., 2015      | 76.49                     | 69.79                    | 25                                                 | 161                                                   |
| AN02      | 16-17, Dec., 2015      | 76.92                     | 70.64                    | 20                                                 | 125                                                   |
| AN03      | 17-18, Dec., 2015      | 77.62                     | 71.5                     | 17                                                 | 158                                                   |
| AN04      | 18-19, Dec., 2015      | 77.69                     | 72.37                    | 11                                                 | 123                                                   |
| AN05      | 19-20, Dec., 2015      | 77.17                     | 73.15                    | 17                                                 | 122                                                   |
| AN06      | 20-22, Dec., 2015      | 76.97                     | 73.86                    | 22                                                 | 86                                                    |
| AN07      | 22-23, Dec., 2015      | 76.98                     | 74.9                     | 31                                                 | 118                                                   |
| AN08      | 23-24, Dec., 2015      | 76.82                     | 75.87                    | 11                                                 | 127                                                   |
| AN09      | 24-25, Dec., 2015      | 77.02                     | 76.86                    | 30                                                 | 211                                                   |
| AN10      | 25-26, Dec., 2015      | 77.71                     | 77.15                    | 61                                                 | 193                                                   |
| AN11      | 26-27, Dec., 2015      | 76.99                     | 78.36                    | 97                                                 | 113                                                   |
| AN12      | 27-29, Dec., 2015      | 77.00                     | 79.01                    | 24                                                 | 87                                                    |
| AN13      | 29-30, Dec., 2015      | 77.26                     | 79.82                    | 64                                                 | 114                                                   |
| AN14      | 30-31, Dec., 2015      | 77.12                     | 80.42                    | 118                                                | 320                                                   |
| AN15      | 3-5, Jan., 2016        | 77.12                     | 80.42                    | 43                                                 | 238                                                   |
| AN16      | 10-12, Jan., 2016      | 77.12                     | 80.42                    | 57                                                 | 220                                                   |
| AN17      | 12-14, Jan., 2016      | 77.12                     | 80.42                    | 65                                                 | 201                                                   |
| AN18      | 14-16, Jan., 2016      | 77.12                     | 80.42                    | 80                                                 | 268                                                   |
| AN19      | 16-18, Jan., 2016      | 77.12                     | 80.42                    | 80                                                 | 205                                                   |
| AN20      | 18-19, Jan., 2016      | 77.12                     | 80.42                    | 52                                                 | 155                                                   |
| AN21      | 19-20, Jan., 2016      | 77.12                     | 80.42                    | 56                                                 | 115                                                   |
| AN22      | 21-22, Jan., 2016      | 77.17                     | 79.63                    | 55                                                 | 152                                                   |
| AN23      | 22-23, Jan., 2016      | 77.03                     | 78.77                    | 14                                                 | 170                                                   |
| AN24      | 23-24, Jan., 2016      | 77.19                     | 77.83                    | 27                                                 | 185                                                   |
| AN25      | 24-25, Jan., 2016      | 77.02                     | 76.74                    | 24                                                 | 191                                                   |
| AN26      | 25-26, Jan., 2016      | 77.03                     | 76.42                    | 30                                                 | 244                                                   |
| AN27      | 26-27, Jan., 2016      | 76.83                     | 75.87                    | 30                                                 | 183                                                   |
| AN28      | 27-28, Jan., 2016      | 76.96                     | 75.03                    | 33                                                 | 189                                                   |
| AN29      | 28-29, Jan., 2016      | 77.00                     | 74.09                    | 24                                                 | 162                                                   |
| AN30      | 29, Jan.-1, Feb., 2016 | 76.97                     | 73.86                    | 16                                                 | 152                                                   |
| AN31      | 1-2, Feb., 2016        | 77.38                     | 72.84                    | 13                                                 | 170                                                   |
| AN32      | 2-3, Feb., 2016        | 77.97                     | 71.93                    | 6                                                  | 172                                                   |
| AN33      | 3-4, Feb., 2016        | 77.19                     | 70.97                    | 19                                                 | 169                                                   |
| AN34      | 4-6, Feb., 2016        | 76.52                     | 69.97                    | 12                                                 | 168                                                   |

7

8

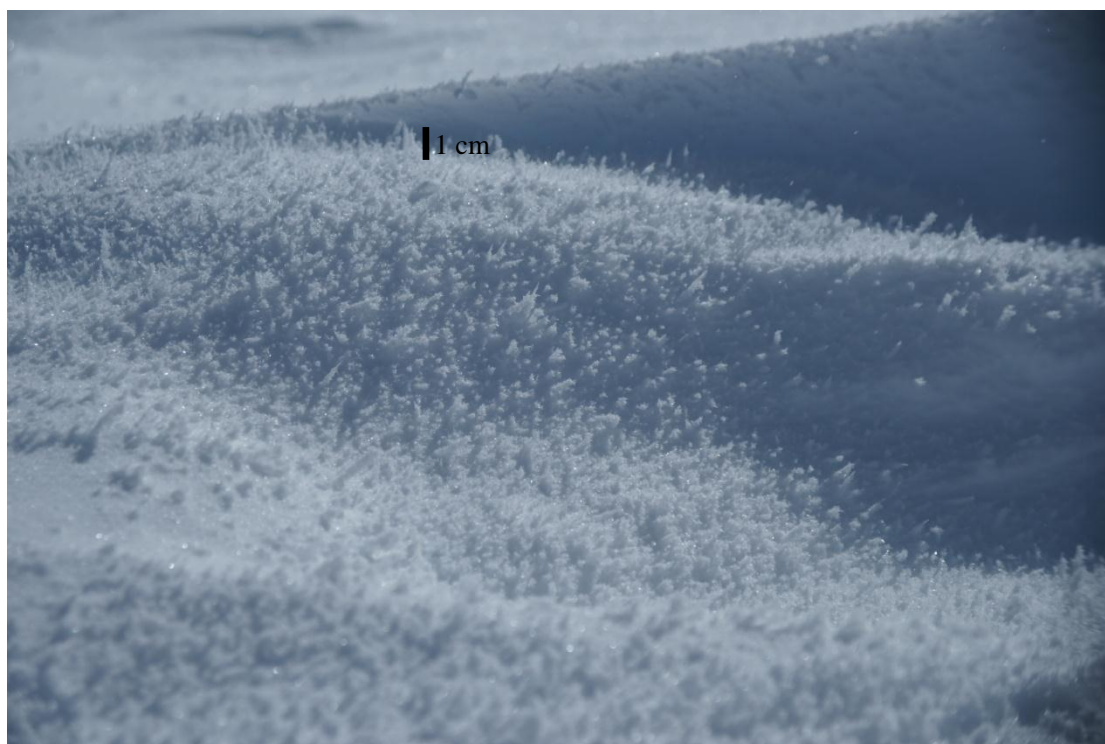

9

10 Figure S1 Surface morphology of the snow on Dome A plateau, East Antarctica. The needle crystal ice  
11 layer is extensively developed. In general, the depth of the crystal layer is  $< 1.0$  cm, and the snowpack  
12 is characterized by soft snow texture.

13

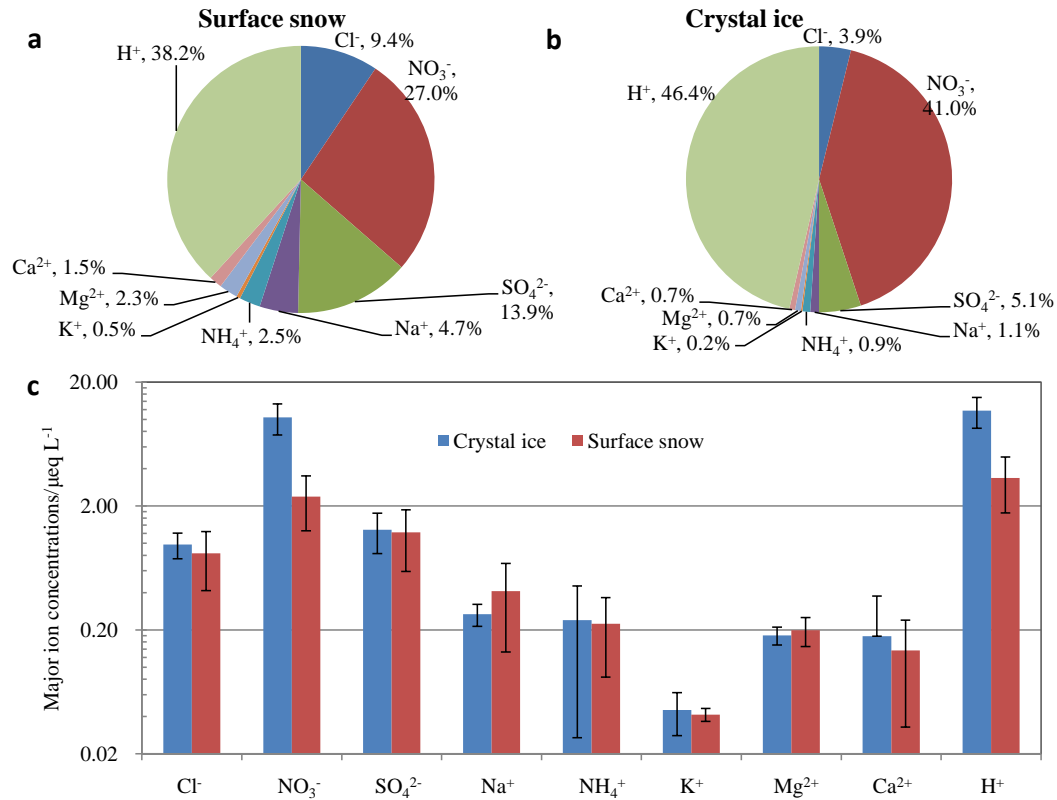

14

15 Figure S2 Major chemical ions in surface snow and crystal ice samples on the traverse from coast to  
 16 the ice sheet summit (Dome A) in East Antarctica. Contribution percentages of each ion to total ion  
 17 concentrations are shown in (a) and (b), respectively. Concentrations of ions in surface snow and  
 18 crystal ice are shown in (c), with error bars of one standard deviation ( $1\sigma$ ). The concentration of H<sup>+</sup> is  
 19 calculated from the difference between sum anions and sum cations. Note that a base-10 log scale is  
 20 used for ion concentrations in (c).

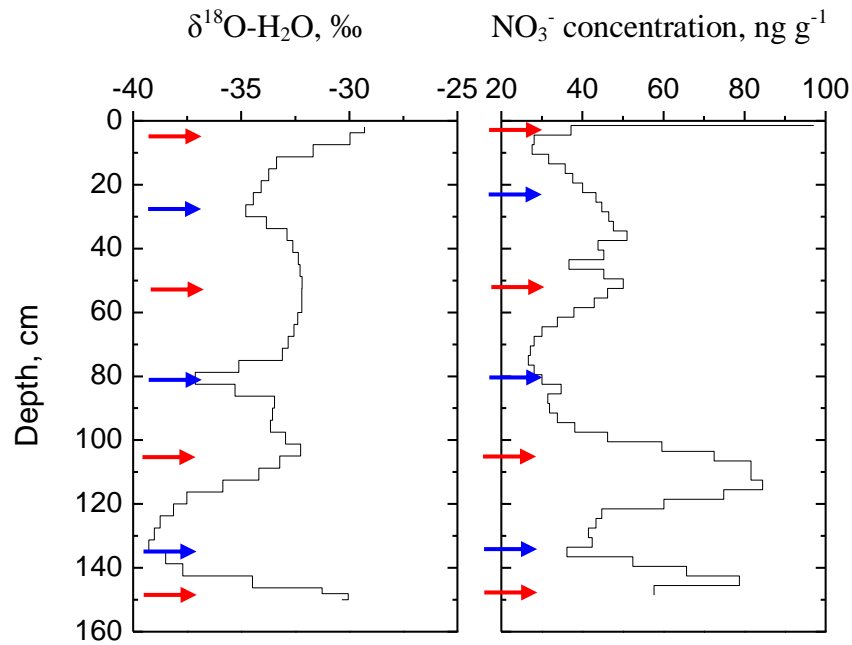

22

23 Figure S3 Profiles of  $\delta^{18}\text{O}$  of  $\text{H}_2\text{O}$  (left panel) and  $\text{NO}_3^-$  concentration (right panel) in the coastal  
 24 snowpit SP2. Red and blue arrows represent the middle of the identified warm and cold seasons,  
 25 respectively. Red solid arrows and blue dashed arrows represent the middle of the identified warm and  
 26 cold seasons, respectively. One seasonal cycle represents one  $\delta^{18}\text{O}(\text{H}_2\text{O})$  local maxima peak to the next.

27

28

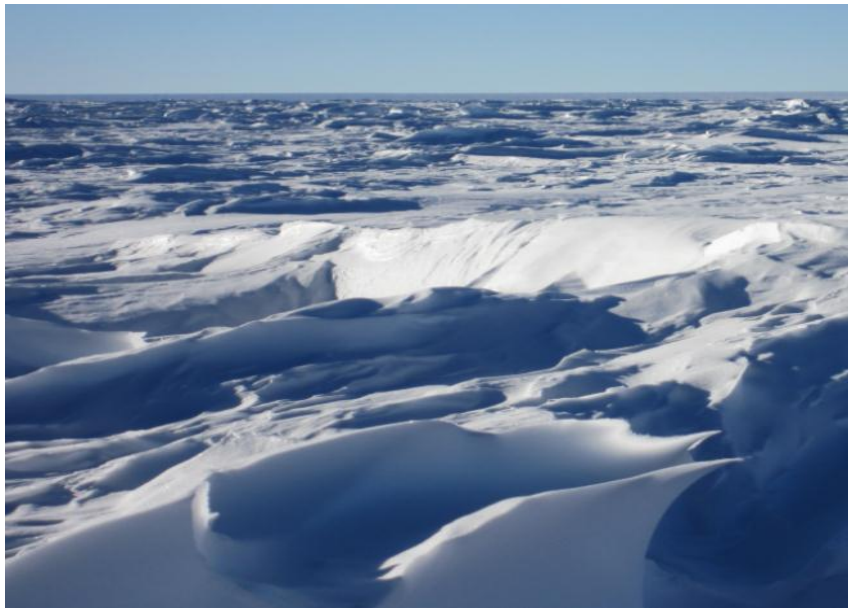

30

31 Figure S4 Surface morphology of the surface snow at ~600 km from the coast, on the traverse from  
32 Zhongshan to Dome A, East Antarctica. The large sastrugi with hard smooth surfaces is extensively  
33 developed in this region, mainly formed by wind erosion. The ridges of these sastrugi are typically  
34 parallel to the prevailing wind direction.

35

36 References

- 37 Erbland, J., Vicars, W., Savarino, J., Morin, S., Frey, M., Frosini, D., Vince, E., and Martins, J.: Air-snow  
38 transfer of nitrate on the East Antarctic Plateau - Part 1: Isotopic evidence for a photolytically driven  
39 dynamic equilibrium in summer, *Atmos. Chem. Phys.*, 13, 6403-6419, doi:10.5194/acp-13-6403-2013,  
40 2013.
- 41 Frey, M.M., Savarino, J., Morin, S., Erbland, J., and Martins, J.: Photolysis imprint in the nitrate stable  
42 isotope signal in snow and atmosphere of East Antarctica and implications for reactive nitrogen cycling,  
43 *Atmos. Chem. Phys.*, 9, 8681-8696, 2009.
- 44 Savarino, J., Kaiser, J., Morin, S., Sigman, D.M., and Thiemens, M.H.: Nitrogen and oxygen isotopic  
45 constraints on the origin of atmospheric nitrate in coastal Antarctica, *Atmos. Chem. Phys.*, 7,  
46 1925-1945, 2007.
- 47 Shi, G., Li, Y., Jiang, S., An, C., Ma, H., Sun, B., and Wang, Y.: Large-scale spatial variability of major ions  
48 in the atmospheric wet deposition along the China Antarctica transect (31° N~ 69° S), *Tellus B*, 64,  
49 17134, doi:10.3402/tellusb.v64i0.17134, 2012.
- 50 Zatko, M.C., Geng, L., Alexander, B., Sofen, E.D., and Klein, K.: The impact of snow nitrate photolysis on  
51 boundary layer chemistry and the recycling and redistribution of reactive nitrogen across Antarctica  
52 and Greenland in a global chemical transport model, *Atmos. Chem. Phys.*, 16, 2819-2842,  
53 doi:10.5194/acp-16-2819-2016, 2016.
- 54
